# 1 Targeted directional kilobase sequence insertion by combining prime editing with 2 recombinases or integrases

3 Nathaniel Jillette<sup>1</sup>, Jacqueline Jufen Zhu<sup>1,5,6</sup>, Albert Wu Cheng<sup>1,2,3,4,5,6</sup>

4 1. The Jackson Laboratory for Genomic Medicine, Farmington, CT 06032, USA

5 2. The Jackson Laboratory Cancer Center, Bar Harbor, ME 04609, USA

6 3. Department of Genetics and Genome Sciences, University of Connecticut Health  
7 Center, Farmington, CT 06030, USA

8 4. Institute for Systems Genomics, University of Connecticut Health Center, Farmington,  
9 CT 06030, USA

10 5. School of Biological and Health Systems Engineering, Arizona State University, Tempe,  
11 AZ 85281, USA

12 6. Correspondence: [albert@cheng.bio](mailto:albert@cheng.bio) or [jacquelinejufenzhu@gmail.com](mailto:jacquelinejufenzhu@gmail.com)

## 13 14 **Abstract**

15  
16 Targeted insertion of exogenous sequences to genomes is useful for therapeutics and biological  
17 research. While CRISPR/Cas technologies have been very efficient in gene knockouts by double-  
18 strand breaks (DSBs) followed by indel formation through non-homologous end-joining (NHEJ)  
19 repair pathway, the precise introduction of new sequences mainly rely on inefficient homology  
20 directed repair (HDR) pathways following Cas9-induced DSBs and are restricted to dividing cells.  
21 The recent invention of Prime Editing allows short sequences to be precisely inserted at target  
22 sites without DSBs. Here, we combine Prime Editing and sequence-specific recombinases and  
23 integrases to insert kilobase sequences directionally at target sites. This technique, called  
24 PRIMAS for PrimE editing, Recombinase, Integrase-mediated Addition of Sequences, will expand  
25 our genome editing toolbox for targeted insertion of long sequences up to kilobases and beyond.

26  
27  
28

## 29 **Introduction**

30  
31 CRISPR/Cas technology has provided great power in editing the genome<sup>1-3</sup>. While indel-  
32 mediated knockout of genes is efficient with the NHEJ repair pathway following double-stranded  
33 breaks (DSBs), precise editing relies on homologous recombination happening at a much lower  
34 efficiency and is restricted mostly to dividing cells<sup>4</sup>. Furthermore, the reliance on DSBs means  
35 that off-target cutting by Cas9 might induce unwanted perturbations in the genome. Prime editing  
36 is a recent advancement in the CRISPR/Cas toolbox using Cas9 nickase to generate single-  
37 stranded nick; the nicked strand subsequently acts as primer annealing to an extended prime  
38 editing guide RNA (pegRNA) which serves as a template for reverse transcription (RT)<sup>5</sup>.  
39 Sequence changes or insertions are encoded in the template region of pegRNA and are  
40 incorporated at the target. Prime editing allows addition of sequences without DSBs in non-  
41 dividing cells, thus improving the safety and scope of CRISPR/Cas genome editing. Prime editing  
42 has been shown to insert short sequences, however, longer sequences up to thousands of bases  
43 have not been demonstrated. On the other hand, site-specific recombinases and integrases (e.g.,  
44 BxB1, PhiC31, Cre, FlpE) can mediate insertion of DNA via specific sequences and have been  
45 widely applied in genetic models<sup>6-9</sup>. The insertion of DNA is mediated by short sequences which  
46 might be amenable to prime editing-mediated insertion. Here, we describe a hybrid approach,  
47 PRIMAS (Primase editing, Recombinase, Integrase-mediated Addition of Sequences), using a  
48 combination of prime editor and recombinase/integrase to insert kilobases of DNA into target site.  
49 Briefly, recombinase/integrase recognition sites are encoded on a pegRNA and inserted to the  
50 target site via prime editing. A recombinase/integrase uses the inserted recognition site at the  
51 target locus to incorporate donor DNA flanked by cognate recombinase/integrase sites.

52

53

## 54 **Results**

### 55 ***Targeted directional insertion of donor DNA payload by combining prime editing and dual*** 56 ***integrases.***

57 We tested PRIMAS strategy at the HEK3 locus for inserting a donor DNA payload  
58 containing CAGGS promoter-driven Blasticidin resistance gene-2A-mScarlet fluorescent gene-  
59 BGH polyA signal (CAGGS-Blast-2A-mScarlet-pA, 2605bp). Many applications such as protein  
60 tagging require insertion of DNA with directional specificity. To achieve that, we tested if we could  
61 use two different integrases to flank the payload DNA for use in PRIMAS. We created a donor  
62 plasmid with AttB(Bxb1) and AttB(PhiC31) sites<sup>8</sup> flanking the payload (**FIG. 1A**). We constructed  
63 a vector expressing pegRNA with priming site for HEK3 locus and RT template encoding  
64 attachment sites for Bxb1 and PhiC31, i.e., AttP(Bxb1) and AttP(PhiC31), respectively (**FIG. 1A**).  
65 We transfected HEK293T cells with Prime editor 2<sup>5</sup> (pCMV-PE2, Cas9(H840A)-M-MLV  
66 RT(D200N/L603W/T330P/T306K/W313F), Addgene #132775), BxB1-expressing plasmid<sup>8</sup>  
67 (pCMV-Bx, Addgene #51552), PhiC31-expression plasmid<sup>8</sup> (pCS-kl, Addgene #51553), pegRNA-  
68 expressing plasmid, and the donor DNA vector (**FIG. 1A**). To detect the targeted insertion of the  
69 DNA payload, we harvested cells 48 hours after transfection, extracted genomic DNA, and  
70 conducted genotyping PCR using primers P1 and P2, which anneal to HEK3 genomic target and  
71 payload DNA, respectively. Sample transfected with the full set of plasmids (EXP: experimental  
72 sample) show a band indicative of the insertion while control sample (CTL) transfected with a  
73 pegRNA without AttP sites is negative for the PCR (**FIG. 1B**). Sequencing of the purified PCR  
74 band from the experimental sample confirmed the expected HEK3 genomic sequence,  
75 recombined AttR sequence, as well as vector sequence indicative of the precise insertion of the  
76 DNA payload (**FIG. 1B**).

77

78 ***Targeted directional insertion of donor DNA payload by combining prime editing and BxB1***  
79 ***integrase directed by orthogonal flanking attachment sites.***

80 While the use of dual integrases could ensure directionality of payload insertion, the  
81 requirement for the delivery of two integrases simultaneously may pose delivery challenge for  
82 future therapeutic applications. Bxb1 integrase is known to tolerate dinucleotide mutations at the  
83 center of the integration sequence<sup>6</sup>. In addition, the dinucleotide variants are known to be  
84 orthogonal. We thus set out to test if we could flank payload DNA with orthogonal Bxb1 site  
85 variants to achieve directional insertion with only the Bxb1 integrase. We created a donor DNA  
86 vector with payload-flanking orthogonal AttB(gt) and AttB(ga) sites harboring GT and GA central  
87 dinucleotide, respectively (**FIG. 2A**), and a vector expressing pegRNA with priming site for HEK3  
88 locus and RT template encoding the corresponding AttP(gt) and AttP(ga) sites (**FIG. 2A**). We  
89 transfected HEK293T cells with Prime editor 2 (pCMV-PE2), BxB1-expressing plasmid (pCMV-  
90 Bx), pegRNA-expressing plasmid, and the donor DNA vector (**FIG. 2A**). Sample transfected with  
91 the full set of plasmids (EXP: experimental sample) showed a genotyping PCR band indicative of  
92 the insertion which was negative in control sample (CTL) transfected with a pegRNA without AttP  
93 sites (**FIG. 2B**). Sequencing of the positive band from the experimental sample confirmed the  
94 expected HEK3 genomic sequence, recombined AttR sequence, as well as vector sequence  
95 resulting from the precise insertion of the DNA payload (**FIG. 2B**).

96  
97 ***Targeted insertion of donor DNA payload by combining prime editing and FlpE***  
98 ***recombinase***

99 We next tested if recombinases such as FlpE could be used for payload insertion in the  
100 context of PRIMAS. We created a donor plasmid with two FRT sites<sup>7</sup> flanking the Blast-2A-  
101 mScarlet payload (**FIG. 3**), and a vector expressing pegRNA with priming site for HEK3 locus,  
102 and RT template encoding an FRT site<sup>7</sup> (**FIG. 3A**). We transfected HEK293T cells with Prime  
103 editor 2 (pCMV-PE2), FlpE-expressing plasmid<sup>7</sup> (pCAGGS-FlpE-puro, Addgene #20733),

104 pegRNA-expressing plasmid, and the donor DNA vector (**FIG. 3A**). Sequencing of the genotyping  
105 PCR product from the experimental sample confirm the expected HEK3 genomic sequence, FRT  
106 sequence, as well as vector sequence indicative of the precise insertion of the DNA payload (**FIG.**  
107 **3B**).

108

## 109 **Discussion**

110

111 Targeted insertion of long DNA sequences such as therapeutic transgene at safe harbor  
112 or the in-frame tagging of fluorescent proteins are powerful techniques for gene therapy as well  
113 as biological research. The reliance of low efficiency homology-directed repair (HDR) methods  
114 which additionally requires dividing cells limit their scope of applications. The recent invention of  
115 Prime Editing technologies allows efficient insertion of short sequences at defined targets in  
116 dividing and non-dividing cells. Here, we demonstrate the PRIMAS approach - the use of prime  
117 editing to install recognition sites for recombinases and integrases, and concomitant  
118 recombinase- and integrase-mediated directional payload DNA insertion. We believe PRIMAS  
119 will be a powerful addition to our genome editing toolbox that allows double-stranded break-  
120 independent directional insertion of long sequences up to kilobases and beyond.

121

## 122 **Materials & Methods**

### 123 ***Cloning and sequence listing***

124 pCMV-PE2<sup>5</sup> (Addgene #132775), pCMV-Bx<sup>8</sup> (Addgene #51552), pCS-kl<sup>8</sup> (Addgene #51553)  
125 pCAGGS-FlpE-puro<sup>7</sup> (Addgene #20733) were obtained from Addgene. PegRNA containing  
126 integrase/recombinase sites were constructed by a combination of PCR using Ultramers  
127 ordered from IDT, and ligation free cloning method TEDA<sup>10</sup>. Sequences of different elements  
128 are listed below:

129 >AttB(gt) = AttB(Bxb1) wildtype sequence with gt central dinucleotide

130 TCGGCCGGCTTGTGACGACGgcggtctcCGTCGTCAGGATCATCCGGGC

131 >AttB(ga) = AttB(Bxb1-ga) mutant site with ga central dinucleotide

132 TCGGCCGGCTTGTGACGACGgcggactcCGTCGTCAGGATCATCCGGGC

133 >pegRNA-HEK3\_BxB1ga-BxB1\_attP

134 ggcccagactgagcacgtgagtttAagagctaTGCTGGAAACAGCAtagcaagttTaaataaggctagtcggttatc

135 aacttgaaaaagtggcaccgagtcggtgctctgccatcaGTCGTGGTTTGTCTGGTCAACCACGcggactcAGTGG

136 TGTACGGTACAAACCCGACgagttggtcgtcgtaccgtaTCGTGGTTTGTCTGGTCAACCACCGCGgtCTCAGTGG

137 TGTACGGTACAAACCCcgtgctcagtctgttttttt

138 >AttP(gt) = AttP(Bxb1) wildtype sequence with gt central dinucleotide

139 TCGTGGTTTGTCTGGTCAACCACCGCGgtCTCAGTGGTGTACGGTACAAACCC

140 >AttP(ga) = AttP(Bxb1-ga) mutant site with ga central dinucleotide

141 GTCGTGGTTTGTCTGGTCAACCACGcggactcAGTGGTGTACGGTACAAACCCGAC

142 >pegRNA without AttP sites

143 ggcccagactgagcacgtgagtttAagagctaTGCTGGAAACAGCAtagcaagttTaaataaggctagtcggttatc

144 aacttgaaaaagtggcaccgagtcggtgctctgccatcaaagcgtgctcagtctgttttttt

145 >AttB(PhiC31)

146 GTGCGGGTGCCAGGGCGTGCCCTTGGGCTCCCCGGGCGCGTACTCC

147 >pegRNA-HEK3\_PhiC1-BxB1\_attP

148 ggcccagactgagcacgtgagtttAagagctaTGCTGGAAACAGCAtagcaagttTaaataaggctagtcggttatc

149 aacttgaaaaagtggcaccgagtcggtgctctgccatcaCCCAGGTCAGAAGCGGTTTTTCGGGAGTAGTCCCCAAC

150 TGGGGTAACCTTTGAGTTCTCTCAGTTGGGGGCGTAGGGTCGCCGACATGACACAAGGGGTTgagttggtcgtcgtc

151 ccgtaTCGTGGTTTGTCTGGTCAACCACCGCGgtCTCAGTGGTGTACGGTACAAACCCcgtgctcagtctgttttttt

152 t

153 >AttP(PhiC31)

154 CCCAGGTCAGAAGCGGTTTTTCGGGAGTAGTGCCCCAACTGGGGTAACCTTTGAGTTCTCTCAGTTGGGGGCGTAGGG  
155 TCGCCGACATGACACAAGGGGTT  
156 >FRT  
157 GAAGTTCCTATTcGAAGTTCCTATTcctagaaaGtATAGGAACTTC  
158 >pegRNA-HEK3\_FRT  
159 ggcccagactgagcacgtgagtttAagagctaTGCTGGAAACAGCAtagcaagttTaaataaggctagtcggttatc  
160 aacttgaaaaagtggcaccgagtcggtgctctgccatcaGAAGTTCCTATTcGAAGTTCCTATTcctagaaaGtA  
161 TAGGAACTTCcgtgctcagtctgttttttt

162

163 ***Cell culture and transfection, Genotyping PCR and sequencing***

164 HEK293T cells were cultivated in Dulbecco's modified Eagle's medium (DMEM) (Sigma) with  
165 10% fetal bovine serum (FBS)(Lonza), 4% Glutamax (Gibco), 1% Sodium Pyruvate (Gibco) and  
166 penicillin-streptomycin (Gibco). Incubator conditions were 37 °C and 5% CO<sub>2</sub>. Cells were  
167 seeded into 24-well plates the day before transfection. Cells were transfected with 600ng total  
168 plasmid DNA using Lipofetamine 3000 reagent (Invitrogen). For experiment shown in Fig 1, the  
169 plasmid mix included 67ng each of pCMV-PE2, pCMV-Bx, pCS-kl, as well as 200ng of pU6-  
170 pegRNA-HEK3\_PhiC1-BxB1\_attP and 200ng of attB(Bxb1)\_Blast-P2A-mScarlet\_attB(PhiC31).  
171 In the control transfection, a pegRNA inserting CTT triplet<sup>5</sup> instead of integrase sites was used.  
172 For experiment shown in Fig 2, the plasmid mix included 100ng of pCMV-PE2, 100ng of pCMV-  
173 Bx, 200ng of pU6-pegRNA-HEK3\_BxB1ga-BxB1\_attP, and 200ng attB(Bxb1GT)\_Blast-P2A-  
174 mScarlet\_attB(Bxb1GA). For experiment shown in Fig 3, 100ng of pCMV-PE2, 100ng of  
175 pCAGGS-Flpe-puro, 200ng of pU6-pegRNA-HEK3\_FRT and 200ng of FRT\_Blast-P2A-  
176 mScarlet-FRT were used. The day after transfection, cells were replenished with fresh media.  
177 48 hours after transfection, cells were harvested and subjected to DNeasy Blood and Tissue Kit  
178 (QIAGEN) for genomic DNA extraction. Extracted genomic DNA was genotyped for targeted  
179 insertion with primers, P1 (ATGTGGGCTGCCTAGAAAGG) and P2

180 (TTGGACATGAGCCAATATAAATG) using Phusion DNA polymerase (Thermo Fisher). The  
181 positive band from genotyping PCR was subjected to Sanger sequencing.

182

### 183 **Competing Interest Statement**

184 N. J. and A.W.C. are inventors on a patent application filed by the Jackson Laboratory related to  
185 work described in this manuscript.

186

### 187 **Acknowledgements**

188 pCMV-PE2 (Addgene #132775) was a gift from David Liu. pCMV-Bx (Addgene #51552), pCS-kl  
189 (Addgene #51553) were gifts from Michele Calos. pCAGGS-FlpE-puro (Addgene #20733) was  
190 a gift from Rudolf Jaenisch. This work has been supported by the National Human Genome  
191 Research Institute grant R01HG009900 (to A.W.C). Arizona State University startup grant (to  
192 A.W.C.) and Jackson Laboratory internal grants (to A.W.C.).

193



194 **References**

- 195 1. Xiong X, Chen M, Lim WA, et al. CRISPR/Cas9 for Human Genome Engineering and  
196 Disease Research. *Annu Rev Genomics Hum Genet* 2016;17:131–154; doi:  
197 10.1146/annurev-genom-083115-022258.
- 198 2. Khan FA, Pandupuspitasari NS, Chun-Jie H, et al. CRISPR/Cas9 Therapeutics: A Cure for  
199 Cancer and Other Genetic Diseases. *Oncotarget* 2016;7(32):52541–52552; doi:  
200 10.18632/oncotarget.9646.
- 201 3. Adli M. The CRISPR Tool Kit for Genome Editing and Beyond. *Nat Commun* 2018;9(1):1911;  
202 doi: 10.1038/s41467-018-04252-2.
- 203 4. Wiles MV, Qin W, Cheng AW, et al. CRISPR-Cas9-Mediated Genome Editing and Guide  
204 RNA Design. *Mamm Genome Off J Int Mamm Genome Soc* 2015;26(9–10):501–510; doi:  
205 10.1007/s00335-015-9565-z.
- 206 5. Anzalone AV, Randolph PB, Davis JR, et al. Search-and-Replace Genome Editing without  
207 Double-Strand Breaks or Donor DNA. *Nature* 2019;576(7785):149–157; doi:  
208 10.1038/s41586-019-1711-4.
- 209 6. Olorunniji FJ, Merrick C, Rosser SJ, et al. Multipart DNA Assembly Using Site-Specific  
210 Recombinases from the Large Serine Integrase Family. *Methods Mol Biol Clifton NJ*  
211 2017;1642:303–323; doi: 10.1007/978-1-4939-7169-5\_19.
- 212 7. Beard C, Hochedlinger K, Plath K, et al. Efficient Method to Generate Single-Copy  
213 Transgenic Mice by Site-Specific Integration in Embryonic Stem Cells. *Genes N Y N* 2000  
214 2006;44(1):23–28; doi: 10.1002/gene.20180.

- 215 8. Zhu F, Gamboa M, Farruggio AP, et al. DICE, an Efficient System for Iterative Genomic  
216 Editing in Human Pluripotent Stem Cells. *Nucleic Acids Res* 2014;42(5):e34; doi:  
217 10.1093/nar/gkt1290.
- 218 9. Araki K, Araki M and Yamamura K. Targeted Integration of DNA Using Mutant Lox Sites in  
219 Embryonic Stem Cells. *Nucleic Acids Res* 1997;25(4):868–872; doi: 10.1093/nar/25.4.868.
- 220 10. Xia Y, Li K, Li J, et al. T5 Exonuclease-Dependent Assembly Offers a Low-Cost Method for  
221 Efficient Cloning and Site-Directed Mutagenesis. *Nucleic Acids Res* 2019;47(3):e15; doi:  
222 10.1093/nar/gky1169.
- 223
- 224

225  
226

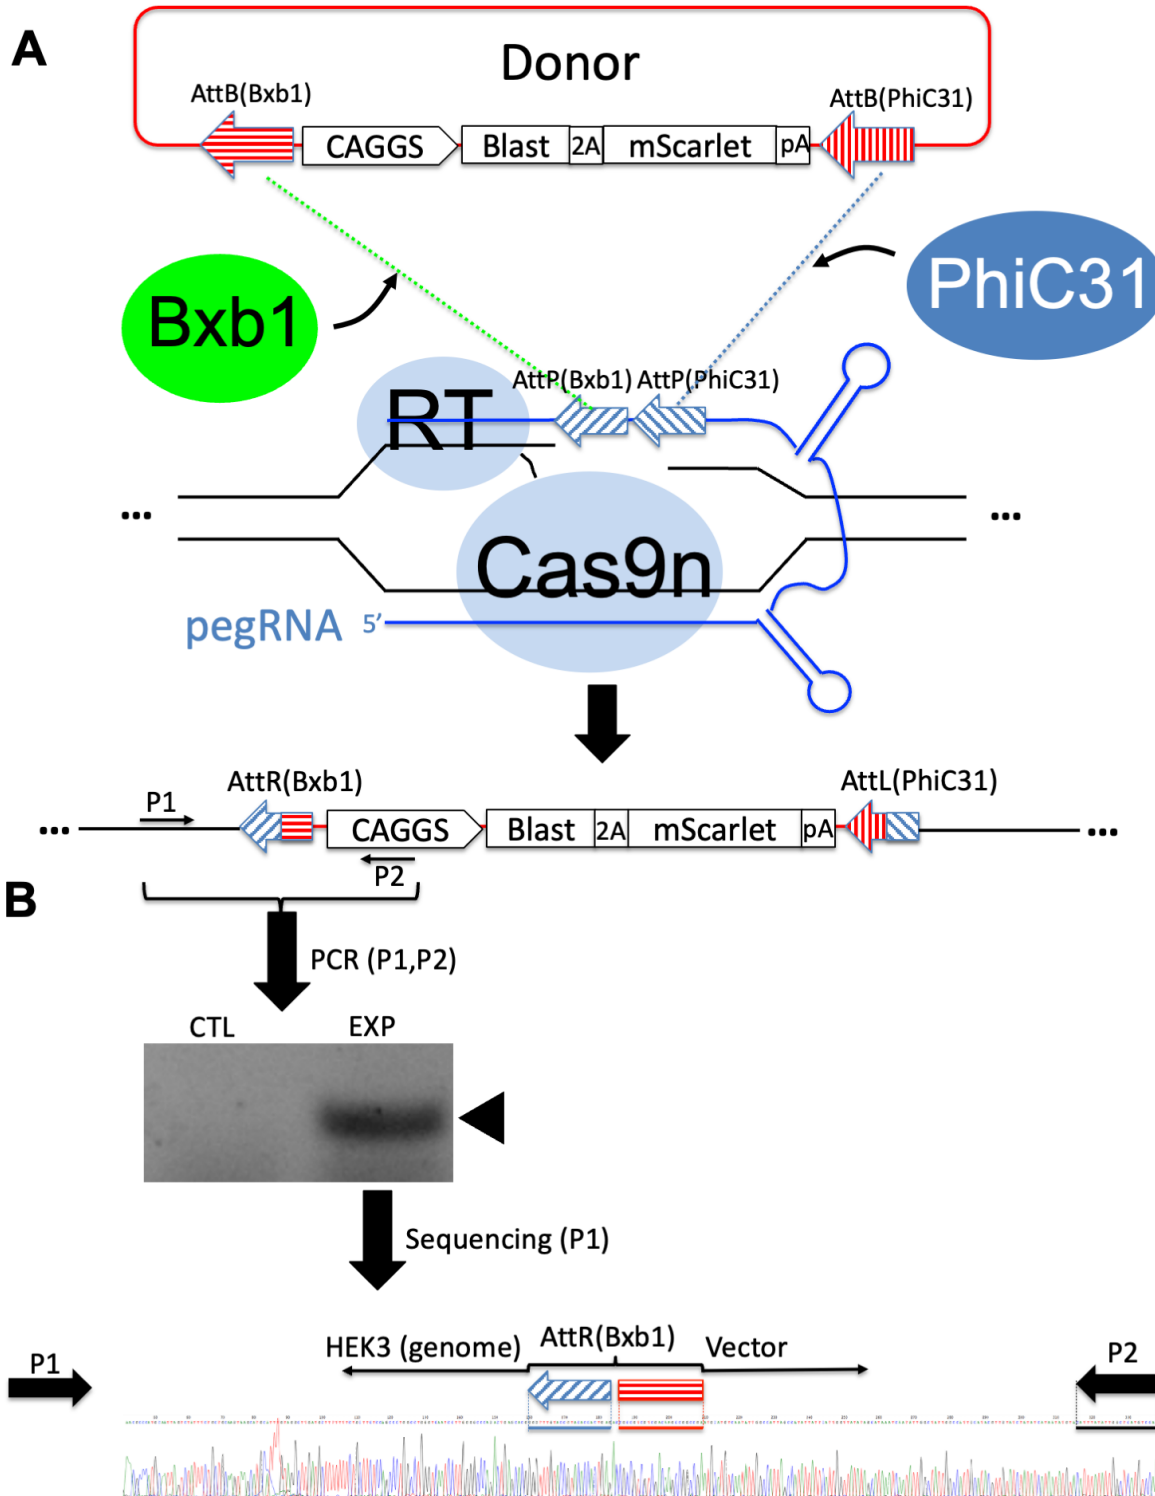

227

228 **FIG. 1. Targeted insertion of donor DNA payload by combining prime editing and dual**  
229 **integrase. (A) Templated addition of a Bxb1 AttP site and a PhiC1 AttP site encoded on the**

230 prime editing guide RNA (pegRNA) by prime editor 2 (PE2, Cas9n-RT) at a target locus (e.g.,  
231 HEK3) allows Bxb1- and PhiC1-mediated site-specific recombination with cognate AttB site pairs  
232 flanking a payload sequence on a donor vector, resulting in donor payload sequence insertion at  
233 the target locus. **(B)** Genotyping PCR using genomic target-specific primer (P1) and vector-  
234 specific primer (P2) revealed the presence of targeted insertion product in experimental sample  
235 (EXP) absent from control (CTL) sample which had received a pegRNA without the AttP sites.  
236 Sequencing trace shows the precise junctional sequences derived from the genomic target and  
237 donor vector and the recombined Bxb1 AttR (AttP x AttB) site.  
238

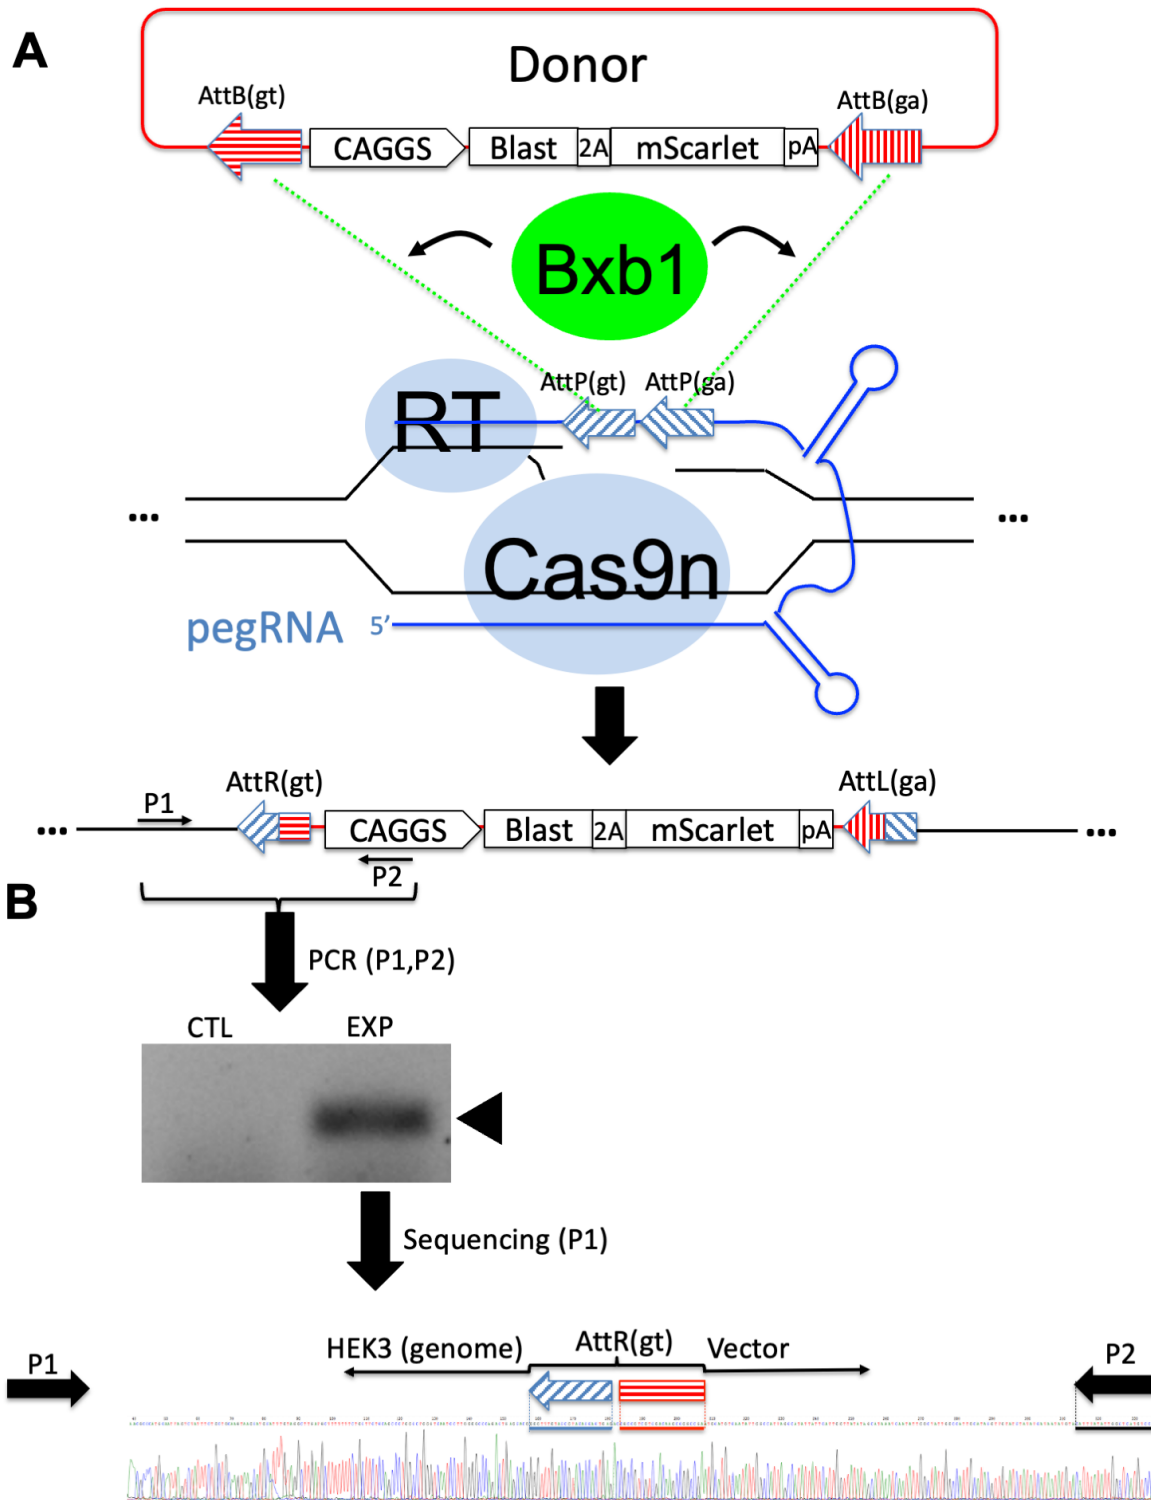

**FIG. 2. Targeted insertion of donor DNA payload by combining prime editing and BxB1 integrase. (A)** Templated addition of orthogonal Bxb1 AttP site pairs with GA and GT central dinucleotide encoded on the prime editing guide RNA (pegRNA) by prime editor 2 (PE2, Cas9n-

243 RT) at a target locus (e.g., HEK3) allows Bxb1-mediated site-specific recombination with cognate  
244 AttB site pairs flanking a payload sequence on a donor vector, resulting in donor payload  
245 sequence insertion at the target locus. **(B)** Genotyping PCR using genomic target-specific primer  
246 (P1) and vector-specific primer (P2) revealed the presence of targeted insertion product in  
247 experimental sample (EXP) absent from control (CTL) sample which had received a pegRNA  
248 without the AttP sites. Sequencing trace shows the correct junctional sequence derived from the  
249 genomic target and donor vector as well as the recombined AttR (AttP x AttB) site.  
250

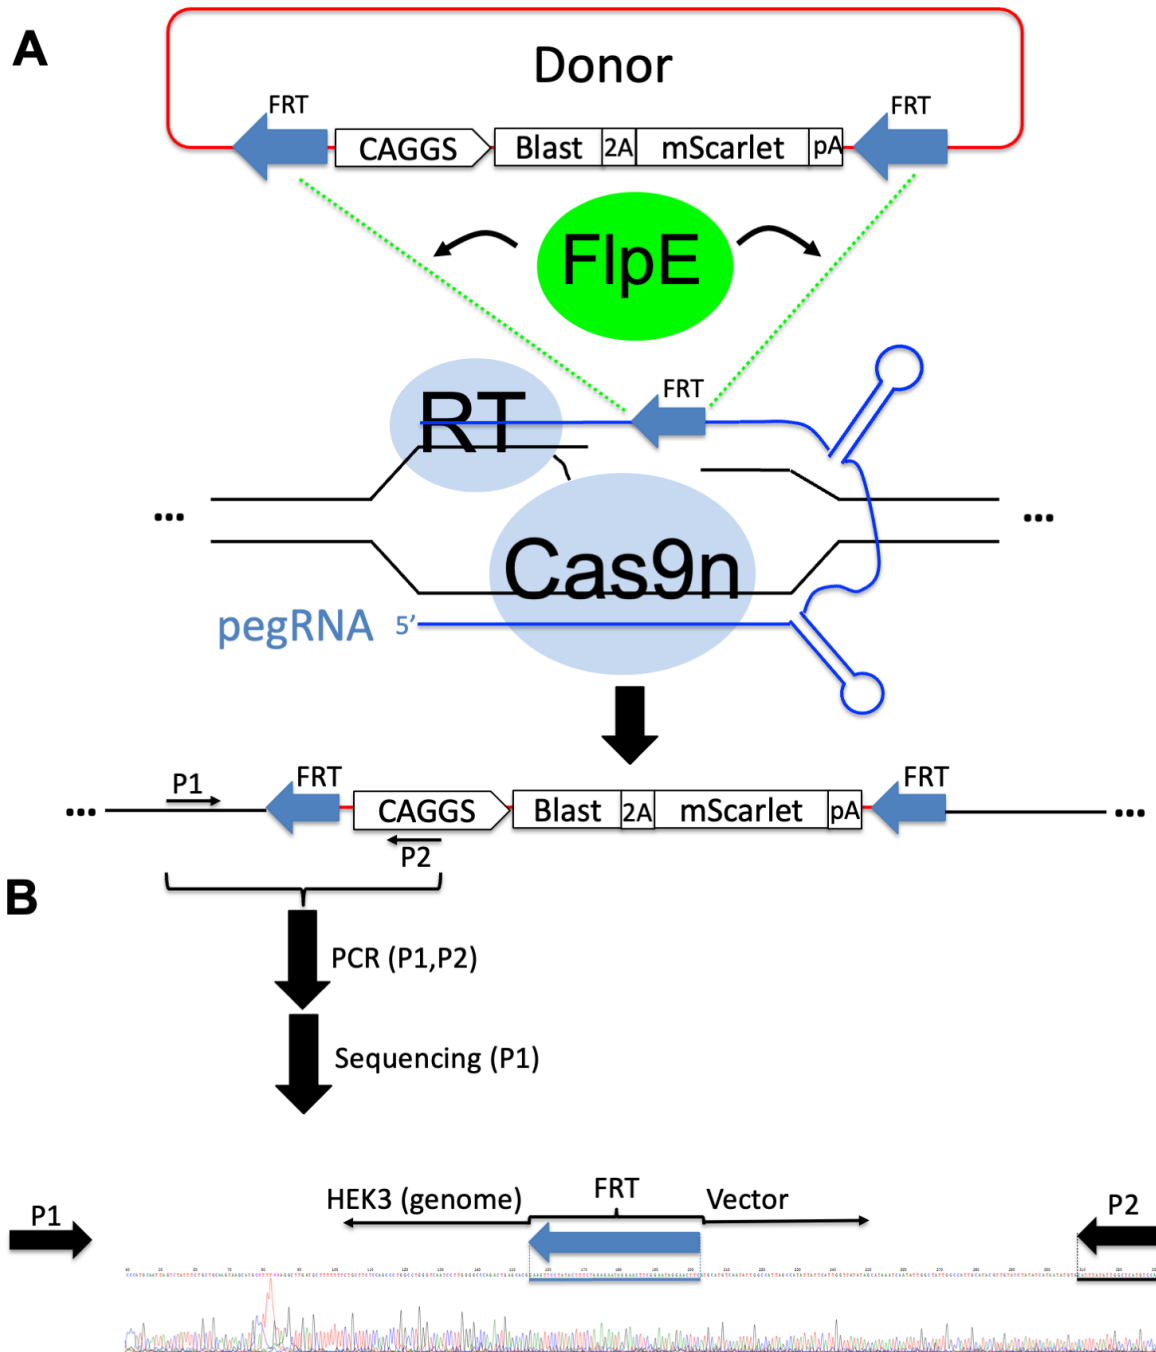

251

252 **FIG. 3. Targeted insertion of donor DNA payload by combining prime editing and FlpE**

253 **recombinase. (A)** Templated addition of an FRT site encoded on the prime editing guide RNA

254 (pegRNA) by prime editor 2 (PE2, Cas9n-RT) at a target locus (e.g., HEK3) allows site-specific

255 recombination with FRT site pairs flanking a payload sequence on a donor vector, resulting in

256 donor payload sequence insertion at the target locus. **(B)** Sequencing trace shows the precise

257 junctional sequences derived from the genomic target and donor vector and the reconstituted  
258 FRT site.
